# Supplementary material for: Developmental stage shapes the realized energy landscape for a flight specialist
Source: eLife. 2024 Sep 11;13:RP98818. doi: 10.7554/eLife.98818 (PMC11390109; doi:10.7554/eLife.98818)
Supplement: Supplementary file 1. — The country and year of tagging for each individual, and the tracking duration (in terms of weeks since dispersal) that each individual contributed to the analysis, are reported. All individuals carried Bird Solar Tags manufactured by e-obs GmbH, Germany (either 45 gr or 25 gr devices). Individual local identifiers match those included in Movebank studies ‘LifeTrack Golden Eagle Alps’ and ‘LifeTrack Golden Eagle Alps Public’. [file elife-98818-supp1.xlsx]

## Sheet: Sheet 1
Individual local identifier	Country	Tagging year	Weeks post-dispersal
Adamello20 (eobs 7548)	Italy	2020	106
Almen18 (eobs 5861)	Switzerland	2018	1
Almen19 (eobs 7001)	Switzerland	2019	156
Art San Romerio18 (eobs 5941)	Switzerland	2018	60
Avers20 (eobs 7101)	Switzerland	2020	105
Burgum21 (eobs 7502)	Italy	2021	42
Cornasc20 (eobs 7039)	Switzerland	2020	59
Dischma1 19 (eobs 7006)	Switzerland	2019	156
Dischma2 19 (eobs 7009)	Switzerland	2019	83
Droslöng17 (eobs 5704)	Switzerland	2017	102
Fahrntal19 (eobs 7014)	Italy	2019	156
Flüela1 21 (eobs 6995)	Switzerland	2021	61
Flüela19 (eobs 7007)	Switzerland	2019	156
Flüela2 21 (eobs 7043)	Switzerland	2021	49
Flüela20 (eobs 7040)	Switzerland	2020	8
Grabernock21 (eobs 7506)	Italy	2021	61
Grosio 19 (eobs 7000)	Italy	2019	156
Güstizia18 (eobs 5942)	Switzerland	2018	83
Kastelbell19 (eobs 7034)	Italy	2019	141
Klausbachtal21 (eobs 7505)	Germany	2021	2
Krn20 (eobs 7549)	Slovenia	2020	80
Langgries21 (eobs 7586)	Austria	2021	46
Mals2\_20 (eobs 7579)	Italy	2020	65
Matsch19 (eobs 7035)	Italy	2019	156
Nalps18 (eobs 5860)	Switzerland	2018	42
Nalps19 (eobs 5861)	Switzerland	2019	60
Reschen20 (eobs 7556)	Italy	2020	130
Reschen21 (eobs 7503)	Italy	2021	60
Sampuoir1 19 (eobs 5943)	Switzerland	2019	9
Sampuoir2 19 (eobs 6462)	Switzerland	2019	72
Schlanders18 (eobs 6226)	Italy	2018	4
Schlappin1 18 (eobs 5858)	Italy	2018	3
Schlappin22 (eobs 5944)	Switzerland	2022	7
Schreital22 (eobs 10537)	Germany	2022	19
Seta19 (eobs 5796)	Switzerland	2019	19
Siat20 (eobs 7037)	Switzerland	2020	107
Sils20 (eobs 7038)	Switzerland	2020	62
Sinestra1 19 (eobs 7003)	Switzerland	2019	156
Sinestra2 19 (eobs 7005)	Switzerland	2019	156
Stürfis20 (eobs 7049)	Switzerland	2020	100
Tasna18 (eobs 5940)	Switzerland	2018	17
Torta19 (eobs 7002)	Switzerland	2019	69
Trenzeira19 (eobs 5858)	Italy	2019	29
Trimmis20 (eobs 7041)	Switzerland	2020	119
Tuors1 19 (eobs 7010)	Switzerland	2019	156
Tuors2 19 (eobs 7011)	Switzerland	2019	156
Ultental22 (eobs 10533)	Italy	2022	6
Umbrail18 (eobs 5859)	Switzerland	2018	37
Untersberg21 (eobs 7501)	Germany	2021	2
Valdidentro\_Braulio20 (eobs 7581)	Italy	2020	24
ValGrande19 (eobs 7033)	Italy	2019	46
ValSozzine21 (eobs 7500)	Italy	2021	60
Vernuga22 (eobs 10538)	Italy	2022	12
Viluoch17 (eobs 4570)	Switzerland	2017	137
Vrata20 (eobs 7551)	Slovenia	2020	16
